1 **Title:**

2

3 Online Phylogenetics using Parsimony Produces Slightly Better Trees and is Dramatically More Efficient  
4 for Large SARS-CoV-2 Phylogenies than *de novo* and Maximum-Likelihood Approaches

5

6 **Authors:**

7

8 Bryan Thornlow<sup>1,2,\*,#</sup>, Alexander Kramer<sup>1,2,#</sup>, Cheng Ye<sup>3</sup>, Nicola De Maio<sup>4</sup>, Jakob McBroome<sup>1,2</sup>, Angie S.  
9 Hinrichs<sup>2</sup>, Robert Lanfear<sup>5</sup>, Yatish Turakhia<sup>3</sup>, Russell Corbett-Detig<sup>1,2,\*</sup> -

10

11 **Affiliations:-**

12

13 <sup>1</sup>Department of Biomolecular Engineering, University of California, Santa Cruz; Santa Cruz, CA  
14 95064, USA-

15 <sup>2</sup>Genomics Institute, University of California, Santa Cruz; Santa Cruz, CA 95064, USA

16 <sup>3</sup>Department of Electrical and Computer Engineering, University of California, San Diego; San  
17 Diego, CA 92093, USA-

18 <sup>4</sup>European Molecular Biology Laboratory, European Bioinformatics Institute (EMBL-EBI),  
19 Wellcome Genome Campus; Cambridge CB10 1SD, UK

20 <sup>5</sup>Department of Ecology and Evolution, Research School of Biology, Australian National  
21 University; Canberra, ACT 2601, Australia

22 \*Correspondence to [bthornlo@ucsc.edu](mailto:bthornlo@ucsc.edu) and [rucorbet@ucsc.edu](mailto:rucorbet@ucsc.edu)

23 #These authors contributed equally to this work.

24

25

26

27 **Abstract:**

28 Phylogenetics has been foundational to SARS-CoV-2 research and public health policy, assisting in  
29 genomic surveillance, contact tracing, and assessing emergence and spread of new variants. However,  
30 phylogenetic analyses of SARS-CoV-2 have often relied on tools designed for *de novo* phylogenetic  
31 inference, in which all data are collected before any analysis is performed and the phylogeny is inferred  
32 once from scratch. SARS-CoV-2 datasets do not fit this mould. There are currently over 10 million  
33 sequenced SARS-CoV-2 genomes in online databases, with tens of thousands of new genomes added  
34 every day. Continuous data collection, combined with the public health relevance of SARS-CoV-2, invites  
35 an "online" approach to phylogenetics, in which new samples are added to existing phylogenetic trees  
36 every day. The extremely dense sampling of SARS-CoV-2 genomes also invites a comparison between  
37 likelihood and parsimony approaches to phylogenetic inference. Maximum likelihood (ML) methods are  
38 more accurate when there are multiple changes at a single site on a single branch, but this accuracy  
39 comes at a large computational cost, and the dense sampling of SARS-CoV-2 genomes means that  
40 these instances will be extremely rare because each internal branch is expected to be extremely short.  
41 Therefore, it may be that approaches based on maximum parsimony (MP) are sufficiently accurate for  
42 reconstructing phylogenies of SARS-CoV-2, and their simplicity means that they can be applied to much  
43 larger datasets. Here, we evaluate the performance of *de novo* and online phylogenetic approaches, and  
44 ML and MP frameworks, for inferring large and dense SARS-CoV-2 phylogenies. Overall, we find that  
45 online phylogenetics produces similar phylogenetic trees to *de novo* analyses for SARS-CoV-2, and that  
46 MP optimizations produce more accurate SARS-CoV-2 phylogenies than do ML optimizations. Since MP  
47 is thousands of times faster than presently available implementations of ML and online phylogenetics is  
48 faster than *de novo*, we therefore propose that, in the context of comprehensive genomic epidemiology  
49 of SARS-CoV-2, MP online phylogenetics approaches should be favored.

50

51 **Key words:**

52 SARS-CoV-2, phylogenetics, parsimony, maximum likelihood, optimization

53

54 **Introduction:**

55

56 The widespread availability and extreme abundance of pathogen genome sequencing has made  
57 phylogenetics central to combatting the pandemic. Communities worldwide have begun implementing  
58 genomic surveillance by systematically sequencing the genomes of a percentage of local cases (Deng et  
59 al. 2020; Lu et al. 2020a; Meredith et al. 2020; Park et al. 2021). This has been invaluable in tracing local  
60 transmission chains (Bluhm et al. 2020; Lam 2020), understanding the genetic makeup of viral  
61 populations within local communities (Gonzalez-Reiche et al. 2020; Franceschi et al. 2021; Thornlow et  
62 al. 2021a), uncovering the means by which viral lineages have been introduced to new areas (Castillo et  
63 al. 2020), and measuring the relative spread of specific variants (Skidmore et al. 2021; Umair et al.  
64 2021). Phylogenetic approaches for better understanding the proximate evolutionary origins of the virus  
65 (Li et al. 2020), as well as to identify recombination events (Jackson et al. 2021; Turakhia et al. 2021b)  
66 and instances of convergent evolution (Kalantar et al. 2020; Peng et al. 2021) have greatly informed our  
67 understanding of the virus. Phylogenetic visualization software including Auspice (Hadfield et al. 2018)  
68 and Taxonium (Sanderson 2021a) have also become widely used for public health purposes.

69 A comprehensive, up-to-date phylogenetic tree of SARS-CoV-2 is important for public health  
70 officials and researchers. A tree containing all available sequences can sometimes facilitate identification  
71 of epidemiological links between samples that might otherwise be obscured in subsampled phylogenies.  
72 Conversely, these approaches can often rule out otherwise plausible transmission histories. Such  
73 information can also help to identify the likely sources of new viral strains in a given area (Moreno et al.  
74 2020; Tang et al. 2021). Additionally, using up-to-date information enables us to find and track quickly  
75 growing clades and novel variants of concern (Annavajhala et al. 2021; Tegally et al. 2021), as well as to  
76 measure the spread of known variants at both global and community scales. Furthermore,  
77 comprehensive phylogenies can facilitate identification of recombinant viral genomes (Turakhia et al.  
78 2021b), natural selection at homoplasious positions (van Dorp et al. 2020), variation in mutation rates  
79 (De Maio et al. 2021a), and systematic recurrent errors (Turakhia et al. 2020). This also facilitates

80 naming lineages of interest, which has been especially important in tracking variants of concern during  
81 the pandemic (e.g. B.1.1.7 or "Alpha" and B.1.617.2 or "Delta") (Rambaut et al. 2020).

82 SARS-CoV-2 presents a unique set of phylogenetic challenges. First, the unprecedented pace  
83 and scale of whole-genome sequence data has forced the phylogenetics community to place runtime  
84 and scalability at the center of every inference strategy. More than 10 million SARS-CoV-2 genome  
85 sequences are currently available, with tens of thousands being added each day. Prior to the pandemic,  
86 *de novo* phylogenetics, or approaches that infer phylogenies from scratch, have been the standard, as  
87 there has rarely been a need to re-infer or improve pre-existing phylogenies on a daily basis. Re-inferring  
88 a tree of more than 10 million samples daily, however, is extremely costly, and has brought a renewed  
89 focus on methods for adding new samples to existing phylogenetic trees (Matsen et al. 2010; Berger et  
90 al. 2011; Izquierdo-Carrasco et al. 2014; Fourment et al. 2018; Barbera et al. 2019). This approach has  
91 been called "online phylogenetics" (Gill et al. 2020), and has important advantages in the context of the  
92 pandemic and beyond. Online phylogenetics is appealing for the genomic surveillance of any pathogen,  
93 because iterative optimization should decrease computational expense, allowing good estimates of  
94 phylogenies to be made readily available.

95 Second, SARS-CoV-2 genomes are much more closely related than sequences in most other  
96 phylogenetic analyses. Because the advantages of maximum likelihood methods decrease for closely  
97 related samples and long branches are relatively rare in the densely sampled SARS-CoV-2 phylogeny  
98 (Felsenstein 1978; Hendy and Penny 1989; Philippe et al. 2005), this suggests that phylogenetic  
99 inferences based on maximum parsimony, a much faster and simpler phylogenetic inference method,  
100 could be better suited for online phylogenetic analyses of SARS-CoV-2 genomes (Wertheim et al. 2021).  
101 The principle of maximum parsimony is that the tree with the fewest mutations should be favored, and it  
102 is sometimes described as a non-parametric phylogenetic inference method (Sullivan and Swofford  
103 2001; Kolaczkowski and Thornton 2004). Additionally, because parsimony-based tree optimization does  
104 not require estimation of ancestral character state uncertainty at all positions in the phylogeny like ML  
105 optimization does, parsimony uses much less memory.

106 Here, we evaluate approaches that would enable one to maintain a fully up-to-date and  
107 comprehensive global phylogeny of SARS-CoV-2 genome sequences (McBroome et al. 2021).  
108 Specifically, we investigate tradeoffs between online and *de novo* phylogenetics and between maximum  
109 parsimony and maximum likelihood approaches when the aim is for an analysis to scale to millions of  
110 sequences, with tens of thousands of new sequences being added daily. We chose to compare  
111 maximum parsimony and maximum likelihood (and omit other approaches like neighbor-joining) because  
112 they were the most effective methods at inferring large SARS-CoV-2 phylogenies based on previous  
113 analyses (Lanfear and Mansfield 2020), and because the most efficient distance-based methods are  
114 quadratic in memory usage so cannot scale to estimating trees from datasets of more than a few  
115 hundred thousand sequences (Wang et al. 2022). We mimic the time-course of the pandemic by  
116 introducing increasingly large numbers of SARS-CoV-2 genome sequences proportionately to their  
117 reported sampling dates.

118 We evaluate potential online phylogenetics approaches by iteratively adding samples to existing  
119 trees and optimizing the augmented phylogeny with different tools that have been proposed for this  
120 purpose during the pandemic. In particular, we evaluate matOptimize, IQ-TREE 2, and FastTree 2.  
121 Between each optimization step, we use UShER (Turakhia et al. 2021a) to add samples to trees by  
122 maximum parsimony. matOptimize is a parsimony optimization approach that uses subtree pruning and  
123 regrafting (SPR) moves to minimize the total mutations in the final tree topology (Ye et al. 2022). IQ-  
124 TREE 2 uses nearest neighbor interchange (NNI) to find the tree with the highest likelihood given an  
125 input multiple sequence alignment (Minh et al. 2020). FastTree 2 uses a pseudo-likelihood approach that  
126 employs minimum-evolution SPR and/or NNI moves and maximum-likelihood NNI moves while using  
127 several heuristics to reduce the search space (Price et al. 2010). The likelihood-based approaches  
128 evaluated here report branch lengths in substitutions per site. Parsimony-based matOptimize reports  
129 branch lengths in total substitutions, which can be converted to the latter by dividing by the genome  
130 length. These branch lengths may be interpreted as is or used as an initial estimate for other distance  
131 measures, for example in the construction of time trees (Sanderson 2021b).

132 Results from our comparisons demonstrate that for the purposes of SARS-CoV-2 phylogenetics,  
133 in which samples are numerous and closely related and inference speed is of high significance,  
134 parsimony-based online phylogenetics applications are clearly most favorable and are also the only  
135 immediately available methods capable of producing daily phylogenetic estimates of all available SARS-  
136 CoV-2 genomes (Turakhia et al. 2021a). We note that matOptimize is used to maintain such a phylogeny  
137 comprising over 9 million genomes as of April 2022 (McBroome et al. 2021). As similarly vast datasets  
138 will soon be available for many species and pathogens, we expect that online approaches using  
139 parsimony or pseudo-likelihood optimization will become increasingly central to phylogenetic inference.

140

## 141 **Results and Discussion:**

142

### 143 **Online phylogenetics is an alternative to de novo phylogenetics for ongoing studies.**

144

145 The vast majority of phylogenetics during the pandemic has consisted of *de novo* phylogenetics  
146 approaches (Hadfield et al. 2018; Li et al. 2020; Lu et al. 2020a, 2020b; Meredith et al. 2020), in which  
147 each phylogeny is inferred using only genetic variation data, and without a guide tree (Fig. 1). This  
148 strategy for phylogenetic inference has long been the default, as in most instances in the past, data are  
149 collected just once for a project, and more relevant data are rarely going to be made available in the near  
150 future. This process is well characterized and has been foundational for many phylogenetics studies  
151 (Hug et al. 2016; Parks et al. 2018; Lu et al. 2020b), and most phylogenetics software is developed with  
152 *de novo* phylogenetics as the primary intended usage.

153

154 A challenging aspect of pandemic phylogenetics is the need to keep up with the pace of data  
155 generation as genome sequences continuously become available. To evaluate phylogenetics  
156 applications in the pandemic (Fig. 1), we split 233,326 samples dated from December 23, 2019 through  
157 January 11, 2021 into 50 batches according to their date of collection. Each batch contains roughly 5,000  
158 samples. Samples in each batch were collected within a few days of each other, except in the first  
159 months of the pandemic when sample collection was more sparse. We also constructed a dataset of

159 otherwise similar data simulated from a known phylogeny (see Methods). The intent of this scheme is to  
160 roughly approximate the data generation and deposition that occurred during the pandemic. All datasets  
161 are available from the repository associated with this project (Thornlow et al. 2021b), for reproducibility  
162 and so that future methods developers can directly compare their outputs to our results. We performed  
163 online and *de novo* phylogenetics using a range of inference and optimization approaches. Since  
164 thousands of new sequences are added to public sequence repositories each day, we terminated any  
165 phylogenetic inference approaches that took more than 24 hours, because such phylogenies would be  
166 obsolete for some public health applications by the time they were inferred.  
167

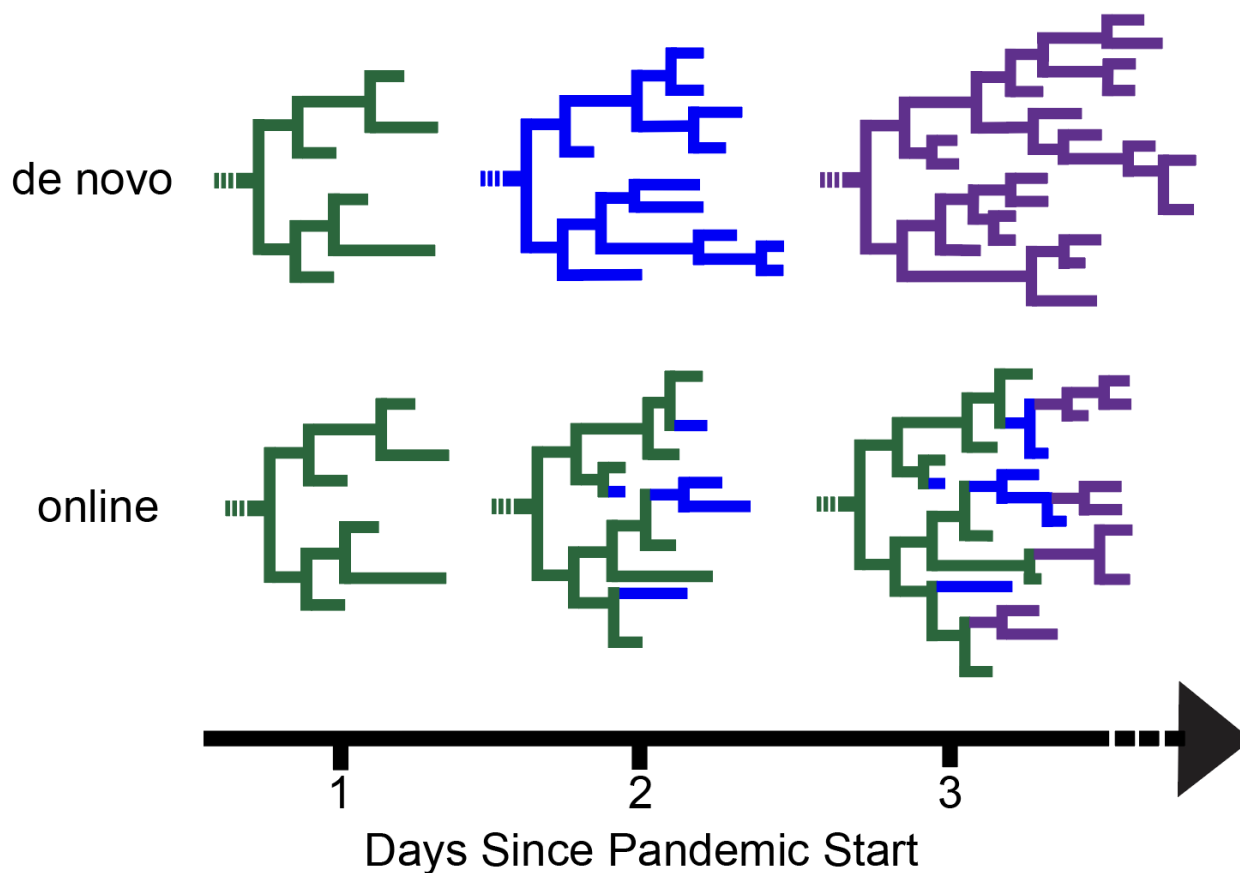

168  
169 **Figure 1: Phylogenies may be optimized from scratch using *de novo* phylogenetics or iteratively**  
170 **using online phylogenetics.** In *de novo* phylogenetics (top), trees are repeatedly re-inferred from  
171 scratch. Conversely, online phylogenetics (bottom) involves placement of new samples as they are  
172 collected. Intermittent optimization steps (not depicted) after new samples are placed can help overcome

173 errors from previous iterations. Online phylogenetics is expected to be much faster and require less  
174 memory than *de novo* phylogenetics.

175

176 **Analyses using simulated data suggest that online phylogenetics is more accurate for SARS-**  
177 **CoV-2.**

178

179 We first compared matOptimize (commit 66ca5ff, conda version 0.4.8) (Ye et al. 2022), IQ-TREE  
180 2 (Minh et al. 2020), and FastTree 2 (Price et al. 2010) using both online and *de novo* phylogenetics  
181 strategies using simulated data that we designed to closely mimic real SARS-CoV-2 datasets. All online  
182 phylogenomics workflows used UShER (Turakhia et al. 2021a) to add new sequences to the previous  
183 tree (see Methods) as to our knowledge it is the only software package that is fast enough to perform  
184 under real time constraints. We chose these three tools based on their widespread usage among SARS-  
185 CoV-2 phylogenetics applications (e.g. matOptimize is part of the UShER suite (Turakhia et al. 2021a),  
186 IQ-TREE 2 is used by (COVID-19 Genomics UK (COG-UK) Consortium 2020; Lanfear and Mansfield  
187 2020) and FastTree 2 is used by (Hadfield et al. 2018)) as well as to cover several different  
188 methodologies.

189 Simulating an alignment based on a known tree ensures that there is a ground truth for  
190 comparison to definitively assess each optimization method. We used an inferred global phylogeny as a  
191 template to simulate a complete multiple sequence alignment using phastSim (De Maio et al. 2021b). We  
192 subsampled this simulated alignment into 50 progressively larger sets of samples, ranging in number of  
193 samples from 4,676 to 233,326 (see Methods), to examine each of the three optimization methods in  
194 both online and *de novo* phylogenetics. We then computed the Robinson-Foulds distance for unrooted  
195 trees of each iteration, after condensing identical samples and collapsing very short branches, to the  
196 global mutation-annotated tree on which the simulation was based, pruned to contain only the relevant  
197 samples, and normalized by the maximum possible Robinson-Foulds distance between the trees (Fig. 2,  
198 Fig. S3) (Steel and Penny 1993).



199 All online phylogenetics methods noticeably outperformed their *de novo* counterparts. Overall,  
200 online matOptimize produced phylogenies with the lowest Robinson-Foulds distance to the ground truth  
201 for the majority of iterations (Fig. 2). Online IQ-TREE 2 performed similarly, but was able to complete  
202 only 25 of the 50 iterations due to its extreme computational resource requirements. For example, for the  
203 14th phylogeny of 60,571 sequences, which was the last phylogeny produced using under 200 GB of  
204 RAM in under 24 hours by all six methods, we found Robinson-Foulds distances of 1696, 2590, and  
205 2130 for *de novo* UShER+matOptimize, FastTree 2, and IQ-TREE 2 respectively, and distances of 1557,  
206 2111, and 1618 for online matOptimize, FastTree 2, and IQ-TREE 2, respectively.

207 There are several possible explanations for the improved performance of online phylogenetics  
208 relative to *de novo* approaches. First, the radius for SPR moves when optimizing a large tree is  
209 insufficiently large to find improvements that are more readily applied when the tree contains fewer  
210 samples as in early rounds of online phylogenetics. In online phylogenetics, these improvements carry  
211 over to subsequent trees, while in *de novo*, they do not. The radius is defined as the phylogenetic  
212 distance of the search space when moving a node to a more optimal position. As the phylogeny  
213 increases in size, the distance from a node to its optimal position is likely to also increase, necessitating  
214 a larger SPR move radius to make equivalent improvements in larger trees. Second, large clades  
215 consisting primarily of samples with branch length zero might further reduce the ability of optimization  
216 methods to find improvements by indirectly limiting search space due to the increased number of edges  
217 when represented internally as a bifurcating tree. It may sometimes be possible to explore moves across  
218 such tree regions during online phylogenetics in early iterations when the polytomy is relatively small.  
219 Third, online phylogenetics facilitates tree optimization by providing an exceptionally good initial tree that  
220 has already been heavily optimized in previous iterations. We expect that this approach will typically  
221 outperform parsimony and neighbor-joining initial trees that are used in most *de novo* phylogenetic  
222 inference approaches. Finally, because each online experiment began with a small tree inferred *de novo*  
223 by stepwise sample addition with UShER, it is possible that these initial trees are more optimal than initial  
224 trees produced during *de novo* inference by the other software we evaluated, perhaps because UShER  
225 prefers the reference nucleotide in cases of ambiguous internal character states.

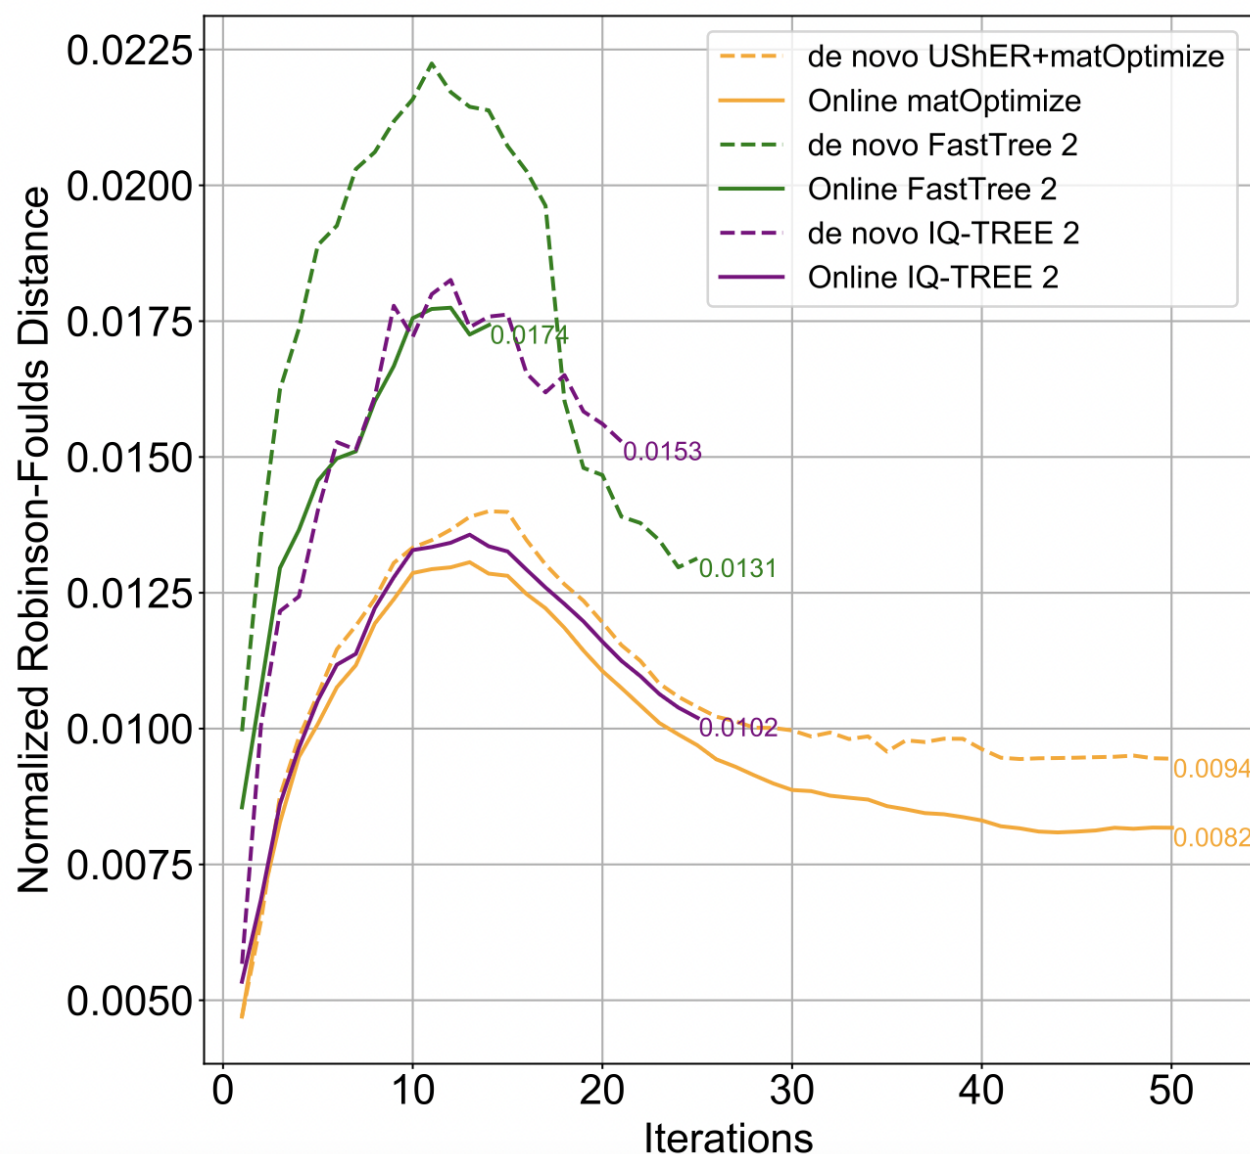

227

228 **Figure 2: Online matOptimize produces phylogenies most similar to ground truth on simulated**

229 **data.** For each batch of samples, we calculated the Robinson-Foulds distance between the tree

230 produced by a given optimization software and the ground truth tree pruned to contain only the relevant

231 samples. We then normalized these values by the maximum possible Robinson-Foulds distance

232 between the two trees (see Figure S3), which is equal to  $2n-6$  where  $n$  equals the number of samples in

233 each tree (Steel and Penny 1993). We terminated FastTree and IQ-TREE after the first phylogeny that

234 took more than 24 hours to optimize.

235

236

237 **Analyses using real data suggest that online phylogenetics is more efficient than *de novo* and**  
238 **produces similarly optimal phylogenies.**

239

240 While analyses using simulated data offer the ability to compare to a known ground truth,  
241 assessing the performance of each method on real SARS-CoV-2 data may more accurately reflect  
242 practical use of each method. Therefore, we also tested each optimization strategy on 50 progressively  
243 larger sets of real SARS-CoV-2 samples and calculated the parsimony score and likelihood of each  
244 optimized tree, as well as the run-time and peak RAM usage of each software package used (Fig. 3). To  
245 accomplish this, we subsampled our global phylogeny, which was produced using stringent quality  
246 control steps (see Methods), as before, to mimic the continuous accumulation of samples over the  
247 course of the pandemic.

248 Online optimizations are generally much faster than *de novo* phylogenetic inference. For  
249 example, IQ-TREE 2 achieves a roughly four-fold faster run-time for online optimizations compared to  
250 inferring the tree *de novo* (Fig. 3c). The 11th iteration, which has 47,819 sequences and was the last to  
251 be completed by both online and *de novo* IQ-TREE 2, took 22 hours 50 minutes for *de novo* IQ-TREE 2  
252 but only 5 hours 26 minutes for online IQ-TREE 2. *De novo* UShER+matOptimize was the only *de novo*  
253 method to finish all trees in fewer than 24 hours, but its speed for each daily update pales in comparison  
254 to online matOptimize. Online matOptimize is several orders of magnitude faster than its *de novo*  
255 counterpart, and its optimizations for the largest phylogenies take roughly 30 seconds, while *de novo* tree  
256 inference with UShER can take several hours for trees consisting of more than 100,000 samples (Fig.  
257 3c). However, whether a software package is used for online or *de novo* phylogenetics does not strongly  
258 affect its peak memory usage.

259 We also found that online phylogenetics strategies produce trees very similar in both parsimony  
260 score and likelihood to their *de novo* counterparts, with differences of less than 1% in all cases (Fig. 3a-  
261 b). For example, in the 11th iteration containing 47,819 sequences, online IQ-TREE 2 produces a tree  
262 with a parsimony score of 32,005, whereas *de novo* IQ-TREE 2 produces a tree with parsimony score  
263 32,149. Our results suggest that in addition to the computational savings that allow online phylogenetics

264 approaches to continuously stay up-to-date, online phylogenetics approaches also produce trees with  
265 similar parsimony scores and likelihoods to their *de novo* counterparts.

266  
267 **Under pandemic time constraints, parsimony-based optimization methods have favorable metrics**  
268 **compared to ML methods for SARS-CoV-2 phylogenies.**

269  
270 In the case of both *de novo* and online phylogenetics, the parsimony-based matOptimize  
271 outperforms both FastTree 2 and IQ-TREE 2 in runtime and peak memory usage. For the sixth iteration  
272 (26,486 samples), which was the largest phylogeny inferred by all online methods in under 24 hours and  
273 using under 200 GB of RAM, online FastTree 2 required nearly 24 hours and 30.3 GB of RAM, and  
274 online IQ-TREE 2 required 1 hour 45 minutes and 72 GB of RAM. By contrast, matOptimize used only 6  
275 seconds and 0.15 GB of RAM. This iteration contained roughly 10% as many samples as the 50th and  
276 final iteration (233,326 total samples), which online matOptimize completed in 32 seconds using 1.41 GB  
277 of RAM at peak usage. Even this largest tree represents only a very small fraction of the more than 10  
278 million currently available SARS-CoV-2 genomes, indicating that, among the approaches we evaluated,  
279 matOptimize is the only viable option for maintaining a comprehensive SARS-CoV-2 phylogeny via  
280 online phylogenetics.

281 In addition to its scalability, matOptimize outperforms ML optimization methods under 24-hour  
282 time constraints in both the parsimony and likelihood scores of the trees that it infers. For the sixth  
283 iteration (26,486 samples), we found parsimony scores of 16,130, 16,179, and 16,290 for online  
284 matOptimize, IQ-TREE 2, and FastTree 2 respectively. While all methods produce phylogenies with  
285 parsimony scores within 1% of each other, matOptimize is consistently the lowest. However,  
286 matOptimize was developed to optimize by parsimony, while the other methods were developed for ML  
287 optimizations. Unexpectedly, we found log-likelihood scores of -233,414.277, -233,945.528, and -  
288 235,177.396 for matOptimize, IQ-TREE 2, and FastTree 2 respectively, indicating that matOptimize  
289 produces preferable phylogenies based on likelihood as well. We used a Jukes-Cantor (JC) model to  
290 calculate likelihoods due to time constraints in calculation for more complex substitution models, but a

291 Generalised Time Reversible (GTR) model with specified rate parameters produced strongly correlated  
292 likelihoods (Fig. S1). Specifically, we fit a generalized linear model using a Gamma family (inverse link  
293 function) to predict the likelihood of the tree under the JC model using the iteration of tree construction  
294 and the GTR likelihood as predictors. We examined the six trees from the first and second iteration (12 in  
295 total). We found that the GTR likelihood was significantly correlated with the JC likelihood ( $p < 2.27 \times 10^{-5}$ ).  
296

297

298 **Parsimony optimization produces comparable or more favorable SARS-CoV-2 trees than the most**  
299 **thorough maximum likelihood methods.**

300

301 We also compared the performance of *de novo* inference with UShER+matOptimize to state-of-  
302 the-art methods without a 24-hour limit on runtime. In three iterations of increasing size (~4.5k, ~8.9k,  
303 and ~13.2k samples), we inferred trees from real and simulated data using UShER+matOptimize, IQ-  
304 TREE 2 with stochastic search enabled, and RAxML-NG. With the parameters used here, IQ-TREE 2  
305 performs stochastic NNI moves in addition to hill-climbing NNI. RAxML-NG is a maximum likelihood  
306 approach that uses SPR moves to search tree-space for higher likelihood phylogenies (Kozlov et al.  
307 2019). We allowed each experiment to run for up to two weeks. All programs completed successfully on  
308 the first iteration. RAxML-NG did not terminate within two weeks for the second and third iterations. On  
309 real data, we found that UShER+matOptimize produced trees with higher log-likelihoods than IQ-TREE 2  
310 and RAxML-NG across all three iterations (Fig. 4A). Under the substitution model parameters estimated  
311 by IQ-TREE 2, the log-likelihoods for the first iteration were -73780.756, -73828.271, and -73782.289 for  
312 UShER+matOptimize, IQ-TREE 2, and RAxML-NG respectively. Under the parameters estimated by  
313 RAxML-NG, the log-likelihoods for the first iteration were -73754.894, -73801.935, and -73756.246 for  
314 UShER+matOptimize, IQ-TREE 2, and RAxML-NG respectively. On simulated data,  
315 UShER+matOptimize produced trees closer to the ground truth than the other methods when measured  
316 by quartet distance across all three iterations (Fig. 4B). By RF distance, the UShER+matOptimize trees  
317 were closest to the ground truth for the second and third iterations, but the RAxML-NG tree was closest

318 to ground truth in the first iteration (Fig. 4C). We therefore conclude that parsimony-based tree inference  
 319 can perform equivalently or better than state of the art maximum likelihood approaches but do this in a  
 320 tiny fraction of the time, making it by far the most suitable approach for pandemic-scale phylogenetics of  
 321 SARS-CoV-2.

322

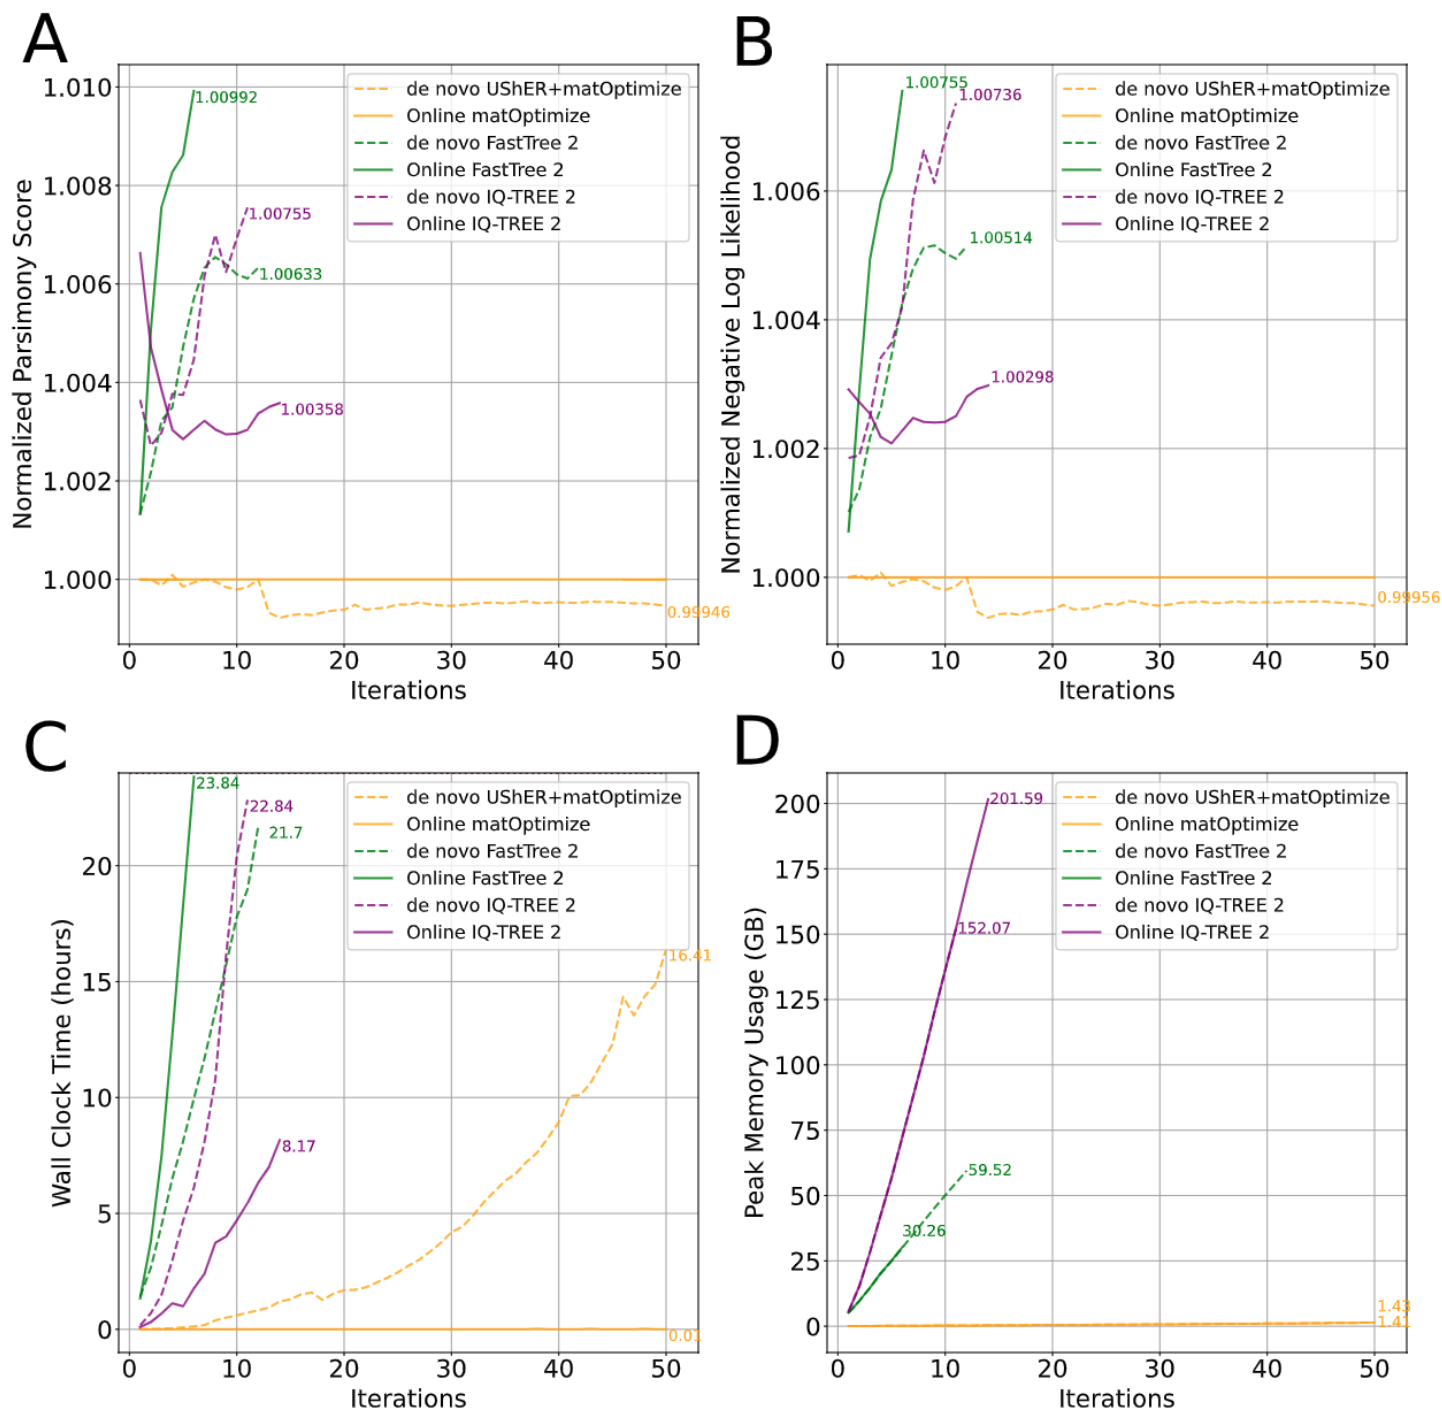

323

324 **Figure 3: In practice, optimization by parsimony is more effective for SARS-CoV-2 data than**  
 325 **optimization by ML.** We calculated (A) the parsimony score for each tree using matUtils, (B) the log-  
 326 likelihood of each tree using IQ-TREE 2, (C) runtime and (D) peak memory usage of each optimization.  
 327 (A) and (B) are normalized by the value obtained for the matOptimize online approach such that all other  
 328 methods are expressed as a ratio. Strategies that surpassed 24 hours (C) or the allowable RAM usage  
 329 (D) were terminated prior. In most cases, with the notable exception of FastTree 2, online phylogenetics  
 330 (solid lines) perform better than de novo phylogenetics (dashed lines). We ran all matOptimize analyses  
 331 using an instance with 15 CPUs and 117.2 GB of RAM, and we ran all IQ-TREE 2 and FastTree 2  
 332 analyses on an instance with 31 CPUs and 244.1 GB of RAM, but limited each command to 15 threads  
 333 for equivalence with matOptimize.

334

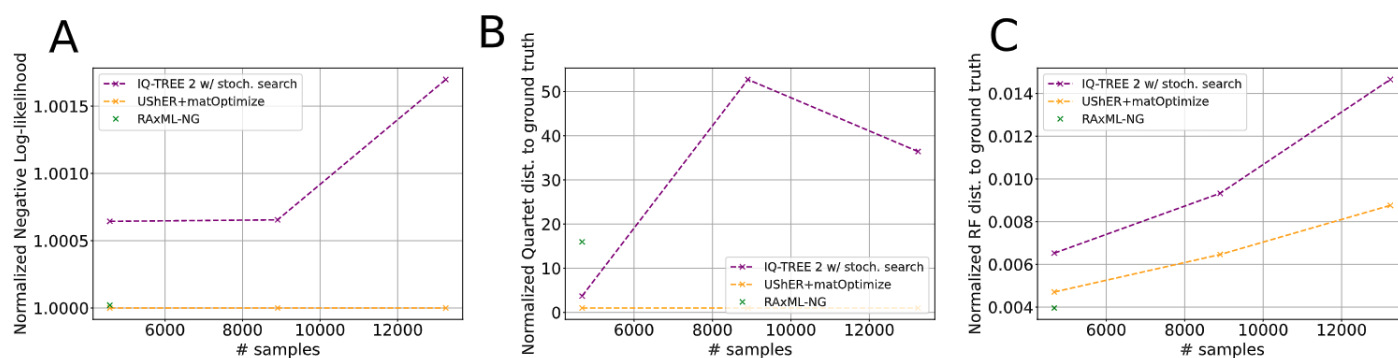

336

337 **Figure 4: de novo matOptimize produces similar or more favorable trees compared to the most**  
 338 **thorough maximum-likelihood inference programs.** We ran these methods for up to two weeks each  
 339 to infer trees de novo from the three smallest iterations of real and simulated data. For real data (A), log-  
 340 likelihoods were computed under the model parameters estimated by IQ-TREE 2 at each iteration.  
 341 Values are normalized by the value of the matOptimize approach such that all other methods are  
 342 expressed as a ratio. For simulated data (B, C), the reported quartet distances (B) are similarly  
 343 normalized by the value of the matOptimize approach such that other methods are expressed as a ratio.  
 344 RF distances (C) are normalized by the maximum possible RF distance of  $2n-6$ , where  $n$  is the number  
 345 of leaves in each tree. For all panels, the second and third iterations of RAxML-NG (which did not  
 terminate within two weeks) are omitted.

346

347 **Parsimony and likelihood are strongly correlated when optimizing large SARS-CoV-2**  
348 **phylogenies.**

349

350 While our comparisons of online and *de novo* as well as parsimony-based and ML optimizations  
351 of cumulative pandemic-style data demonstrated practical performance, the largest trees completed by  
352 all methods in these experiments represent only a small fraction of available SARS-CoV-2 data. It is also  
353 crucial that we identify the optimal ways to produce a large phylogeny from already aggregated data. We  
354 therefore evaluated phylogenetic inference methods for optimizing a tree of 364,427 SARS-CoV-2  
355 genome sequences, without constraining methods according to time or memory requirements. We  
356 optimized this global phylogeny using matOptimize (Ye et al. 2022), IQ-TREE 2 (Minh et al. 2020), and  
357 FastTree 2 (Price et al. 2010). Overall, we found that matOptimize produced the tree with the lowest  
358 parsimony score across all methods in roughly one hour (Table 1).

359 We found that after each of the six iterations of FastTree 2 optimization, the likelihood and  
360 parsimony improvements are strongly linearly correlated (Fig. 5). This suggests that changes achieved  
361 by maximizing parsimony will also optimize likelihood for SARS-CoV-2 data. That is, for extremely  
362 densely sampled phylogenies wherein long branches are especially rare, parsimony and likelihood of  
363 phylogenies, and tree moves to optimize either are highly correlated. However, despite the strength of  
364 this correlation, we find an extreme disparity in practical usage when optimizing by either metric.  
365 Parsimony-based methods are far more time- and data-efficient, and presently available ML approaches  
366 quickly become prohibitively expensive. For example, while the 6 iterations of FastTree did result in large  
367 improvements in both likelihood and parsimony score, the resulting tree would be out of date long before  
368 the 10.5-day optimization had completed. Moreover, we applied matOptimize to the tree output by the  
369 sixth iteration of FastTree, achieving a parsimony score of 293,866 (improvement of 288) in just 16  
370 minutes, indicating that even after 10.5 days, additional optimization was still possible. This suggests  
371 that, for the purposes of optimizing even moderately large SARS-CoV-2 trees, parsimony-based  
372 methods should be heavily favored due to their increased efficiency.



373

374

| Method      | Iterations | Runtime (H:M:S) | Final Parsimony Score (Percent Change from Starting Tree) |
|-------------|------------|-----------------|-----------------------------------------------------------|
| IQ-TREE 2   | 2          | 24:30:52        | 294,258 (0.67)                                            |
| FastTree 2  | 6          | 252:02:49       | 294,154 (0.71)                                            |
| matOptimize | 1          | 1:12:03         | 294,022 (0.75)                                            |

375

376 **Table 1:** We applied each of the three optimization methods to a starting tree of 364,427 SARS-CoV-2  
377 samples, which had an initial parsimony score of 296,247. We first ran 2 iterations of IQ-TREE 2  
378 optimization, using an SPR radius of 20 on the first and 100 on the second. We also used an SPR radius  
379 of 10 on one iteration of matOptimize, and six iterations of pseudo-likelihood optimization using FastTree  
380 2, which we terminated after roughly 10.5 days.

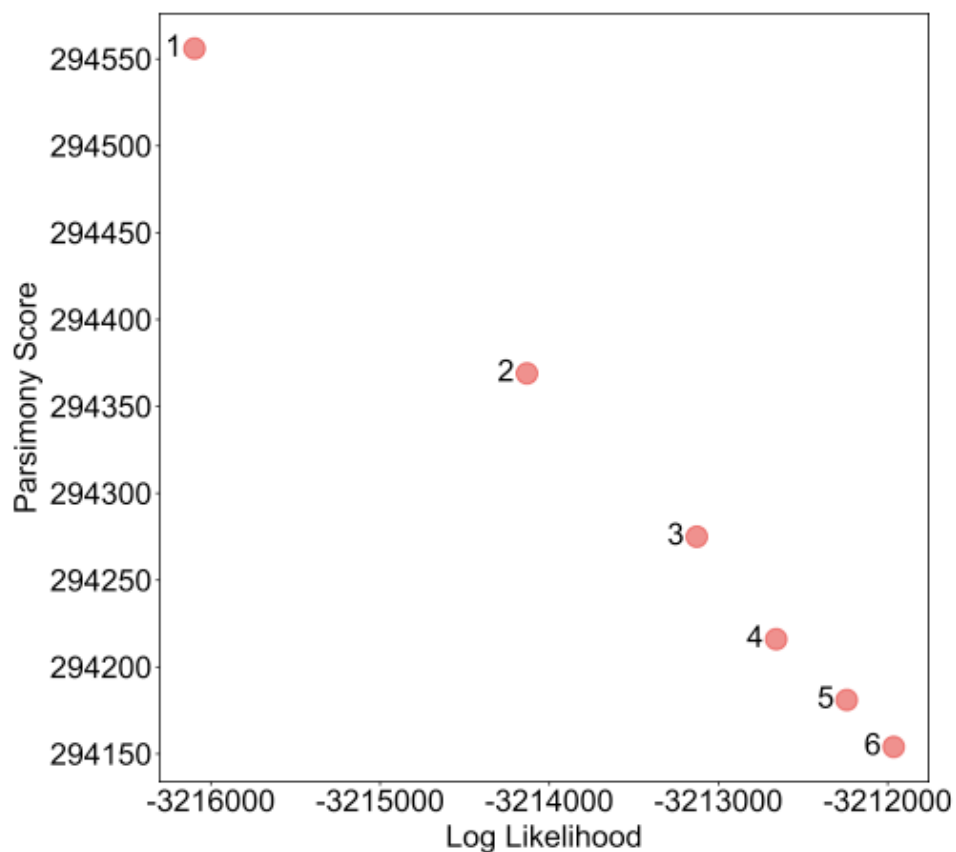

381

382 **Figure 5. Improvement in likelihood and parsimony have a linear relationship for our optimized**  
383 **global tree.** We optimized our initial global tree using 6 iterations of FastTree and measured the total  
384 parsimony and the likelihood after each, finding a linear relationship (Pearson correlation,  $\rho = -1.0$ ,  $p <$   
385  $2.9 \times 10^{-7}$ ).

386

## 387 **Conclusions**

388

389 The SARS-CoV-2 pandemic has made phylogenetics central to efforts to combat the spread of  
390 the virus, but has posed challenges for many commonly used phylogenetics frameworks. A major  
391 component of this effort relies on a comprehensive, up-to-date, global phylogeny of SARS-CoV-2  
392 genomes. However, the scale and continuous growth of the data have caused difficulties for standard *de*  
393 *novo* phylogenetic methods. Here, we find that online phylogenetics methods are practical, pragmatic,  
394 and accurate for inferring daily phylogenetic trees from a large and densely-sample virus outbreak.

395 One counterintuitive result is that parsimony-based optimizations outperform sufficiently efficient  
396 ML approaches regardless of whether phylogenies are evaluated using parsimony or likelihood. This  
397 might be a consequence of the fact that parsimony scores and likelihoods are strongly correlated across  
398 phylogenies inferred via a range of phylogenetic approaches. The extremely short branches (Fig. S2) on  
399 SARS-CoV-2 phylogenies mean that the probability of multiple mutations occurring at the same site on a  
400 single branch is negligible. Stated another way, SARS-CoV-2 is approaching a “limit” where parsimony  
401 and likelihood are nearly equivalent. In turn, because of their relative efficiency, parsimony-based  
402 methods are able to search more of the possible tree space in the same amount of time, thereby  
403 resulting in trees with better likelihoods and lower parsimony scores than trees optimized using currently-  
404 available ML software packages. We emphasize that this does not bear on the relative merits of the  
405 underlying principles of ML and MP, but instead reflects the utility of methods that have been applied  
406 during the pandemic. Nevertheless, this observation does suggest that in some cases, MP optimization  
407 may provide a fast and accurate starting point for ML optimization methods. Indeed, many popular  
408 phylogenetics software, such as RAxML (Stamatakis 2014) and IQ-TREE (Minh et al. 2020) already use

409 stepwise-addition parsimony trees as initial trees for their optimization. Our results suggest that further  
410 optimization of these initial trees using MP may provide benefits in speed *and* accuracy for some  
411 datasets, even when the target is an estimate of the ML tree.

412 As sequencing technologies progress and become more readily available, sample sizes for  
413 phylogenetic analyses of major pathogens and highly-studied organisms will necessarily continue to  
414 increase. Today, SARS-CoV-2 represents an extreme with respect to the total number of samples  
415 relative to the very short branch lengths on the phylogeny. However, the global sequencing effort during  
416 the pandemic suggests that the public health sphere has a strong interest in the increased application of  
417 whole-genome sequencing to study the genomic contents, evolution, and transmission history of major  
418 and emerging human pathogens. We expect that million-sample datasets will become commonplace in  
419 the near future. Parsimony-based methods like matOptimize show promise for huge datasets with short  
420 branch lengths. Similarly, recently developed parsimony-based likelihood approximations may ultimately  
421 be similarly scalable and accurate (De Maio et al. 2022). Online phylogenetics using both of these  
422 methods will be a fruitful avenue for future development and application to accommodate these datasets.

423

## 424 **Methods**

425

426 We first developed a "global phylogeny", from which all analyses in this study were performed.  
427 We began by downloading VCF and FASTA files corresponding to March 18, 2021 from our own daily-  
428 updated database (McBroome et al. 2021). The VCF file contains pairwise alignments of each of the  
429 434,063 samples to the SARS-CoV-2 reference genome. We then implemented filters, retaining only  
430 sequences containing at least 28,000 non-N nucleotides, and fewer than two non-[ACGTN-] characters.  
431 We used UShER to create a phylogeny from scratch using only the remaining 366,492 samples. To  
432 remove potentially erroneous sequences, we iteratively pruned this tree of highly divergent internal  
433 branches with branch parsimony scores greater than 30, then terminal branches with branch parsimony  
434 scores greater than 6, until convergence, resulting in a final global phylogeny containing 364,427  
435 samples. The branch parsimony score indicates the total number of substitutions along a branch. Similar

436 filters based on sequence divergence are used by existing SARS-CoV-2 phylogenetic inference  
437 methods. For full reproducibility, files used for creating the global phylogeny can be found in  
438 subrepository 1 on the project GitHub page (Thornlow et al. 2021b).

439       Following this, we tested several optimization strategies on this global phylogeny, hereafter the  
440 "starting tree". We used matOptimize, FastTree 2, and maximum parsimony (MP) IQ-TREE 2. MP IQ-  
441 TREE 2 uses parsimony as the optimality criterion in contrast to the maximum likelihood mode used in all  
442 other experiments, which was infeasible on a dataset of this size. In these optimization experiments, we  
443 used experimental versions of MP IQ-TREE 2 that allow finer control of parsimony parameters (specific  
444 versions are listed in the supplemental Github repository). In one experiment, we used the starting tree  
445 and its corresponding alignment and ran five iterations of MP IQ-TREE 2, varying the SPR radius from  
446 20 to 100 in increments of 20. Experiments on a small dataset indicated that there is little or no  
447 improvement in parsimony score beyond a radius of 100. Separately, we tested another strategy that  
448 applied two iterations of MP IQ-TREE 2 to the starting tree, the first iteration using an SPR radius of 20  
449 and the second using a radius of 100. Finally, we tested a strategy of six iterations of pseudo-likelihood  
450 optimization with FastTree 2 followed by two iterations of parsimony optimization with matOptimize. The  
451 tree produced by this strategy, hereafter the "ground truth" tree, had the highest likelihood of all the  
452 strategies we tested. This tree (`after_usher_optimized_fasttree_iter6.tree`) and files for these optimization  
453 experiments can be found in subrepository 2.

454       In the multifurcating ground truth tree of 364,427 samples, there are 265,289 unique (in FASTA  
455 sequence) samples. There are 447,643 nodes in the tree. For reference, a full binary tree with the same  
456 number of leaves has 728,853 nodes. 23,437 of the 29,903 sites in the alignment are polymorphic (they  
457 display at least two non-ambiguous nucleotides). Homoplasies are common in these data. In the starting  
458 tree, 19,090 sites display a mutation occurring on at least two different branches, and 4,976 sites display  
459 a mutation occurring more than ten times in the tree.

460       To mimic pandemic-style phylogenetics, we separated a total of 233,326 samples from the  
461 starting tree of 364,427 samples into 50 batches of ~5,000 by sorting according to the date of sample  
462 collection. We then set up two frameworks for each of the three software packages (matOptimize

463 (commit 66ca5ff, conda version 0.4.8), maximum-likelihood IQ-TREE 2 (multicore version 2.1.3 COVID-  
464 edition), and FastTree 2 (Double Precision version 2.1.10)). The online phylogenetics frameworks began  
465 by using UShER to infer a small tree *de novo* from the first batch of samples, followed by alternating  
466 steps of optimization using one of the three evaluated methods and placement of additional samples with  
467 UShER. In *de novo* phylogenetics, we supplied each software package with an alignment corresponding  
468 to all samples in that batch and its predecessors (or VCF for matOptimize) without a guide tree. For both  
469 cases, each tree is larger than its predecessor by ~5,000 samples, and each tree necessarily contains all  
470 samples in the immediately preceding tree. For FastTree 2, we used 2 rounds of subtree-prune-regraft  
471 (SPR) moves (-spr 2), maximum SPR length of 1000 (-sprlength 1000), zero rounds of minimum  
472 evolution nearest neighbor interchanges (-nni 0), and the Generalised Time Reversible + Gamma  
473 (GTR+G) substitution model (-gtr -gamma). For IQ-TREE 2, we used a branch length minimum of  
474 0.000000001 (-blmin 1e-9), zero rounds of stochastic tree search (-n 0), and the GTR+G substitution  
475 model (-m GTR+G). With these parameters, IQ-TREE 2 constructs a starting parsimony tree and then  
476 performs hill-climbing NNI steps to optimize likelihood, avoiding the significant time overhead of  
477 stochastic search. We ran all matOptimize analyses using an instance with 15 CPUs and 117.2 GB of  
478 RAM, and we ran all IQ-TREE 2 and FastTree 2 analyses on an instance with 31 CPUs and 244.1 GB of  
479 RAM, but we limited each command to 15 threads for equivalence with matOptimize. Files for all  
480 simulated data experiments can be found in subrepository 3.

481 To generate our simulated data, we used the SARS-CoV-2 reference genome (GISAID ID:  
482 EPI\_ISL\_402125; GenBank ID: MN908947.3) (Shu and McCauley 2017; Sayers et al. 2021) as the root  
483 sequence and used phastSim (De Maio et al. 2021b) to simulate according to the ground truth phylogeny  
484 described above. Intergenic regions were evolved using phastSim using the default neutral mutation  
485 rates estimated in ref. (De Maio et al. 2021a), with position-specific mean mutation rates sampled from a  
486 gamma distribution with  $\alpha=\beta=4$ , and with 1% of the genome having a 10-fold increase mutation  
487 rate for one specific mutation type (SARS-CoV-2 hypermutability model described in ref. (De Maio et al.  
488 2021b)). Evolution of coding regions was simulated with the same neutral mutational distribution, with a  
489 mean nonsynonymous/synonymous rate ratio of  $\omega=0.48$  as estimated in (Turakhia et al. 2021a),

490 with codon-specific omega values sampled from a gamma distribution with  $\alpha=0.96$  and  $\beta=2$ .

491 Rates for each intergenic and coding region were not normalized in order to have the same baseline  
492 neutral mutation rate distribution across the genome.

493 We repeated our iterative experiments using *de novo* and online matOptimize, IQ-TREE 2 and  
494 FastTree 2 on this simulated alignment, using the same strategies as before. However, instead of  
495 computing parsimony and likelihood scores, we computed the Robinson-Foulds (RF) distance (Robinson  
496 and Foulds 1981) of each optimization to the ground truth tree, pruned to contain only the samples  
497 belonging to that batch. To calculate each RF distance, we used the -O (collapse tree) argument in  
498 matUtils extract (McBroome et al. 2021) and then used the dist.topo command in the *ape* package in R  
499 (Paradis and Schliep 2019), comparing the collapsed optimized tree and the pruned, collapsed ground  
500 truth tree at each iteration. We computed normalized RF distances as a proportion of the total possible  
501 RF distance, which is equivalent to two times the number of samples in the trees minus six (Steel and  
502 Penny 1993).

503 Eliminating the 24-hour runtime restriction, we also repeated the first three *de novo* iterative  
504 experiments on both real and simulated data to compare USHER+matOptimize, IQ-TREE 2 with  
505 stochastic search, and RAxML-NG. These iterations of ~4.5k, ~8.9k, and ~13.2k samples were allowed  
506 to run for up to 14 days. For runs that did not terminate within this time (the second and third iterations of  
507 RAxML-NG), we used the best tree inferred during the run for comparisons. We ran IQ-TREE 2 and  
508 RAxML-NG under the GTR+G model with the smallest minimum branch length parameter that did not  
509 cause numerical errors. To compare the trees inferred from real data, we computed log-likelihoods under  
510 the GTR+G model for all trees, fixing the model parameters to those estimated by IQ-TREE 2 during tree  
511 inference. We also compared the log-likelihoods of the trees under the parameters estimated by RAxML-  
512 NG for the first iteration, but could not do so for the second and third iterations which did not terminate in  
513 under two weeks. We allowed optimization of branch lengths during likelihood calculation. For the  
514 USHER+matOptimize trees, before computing likelihoods, we converted the branch lengths into units of  
515 substitutions per site by dividing each branch length by the alignment length (29,903). To compare the

516 trees inferred from simulated data, we computed the RF and quartet distances of each tree to the  
517 corresponding ground truth tree described above.

518

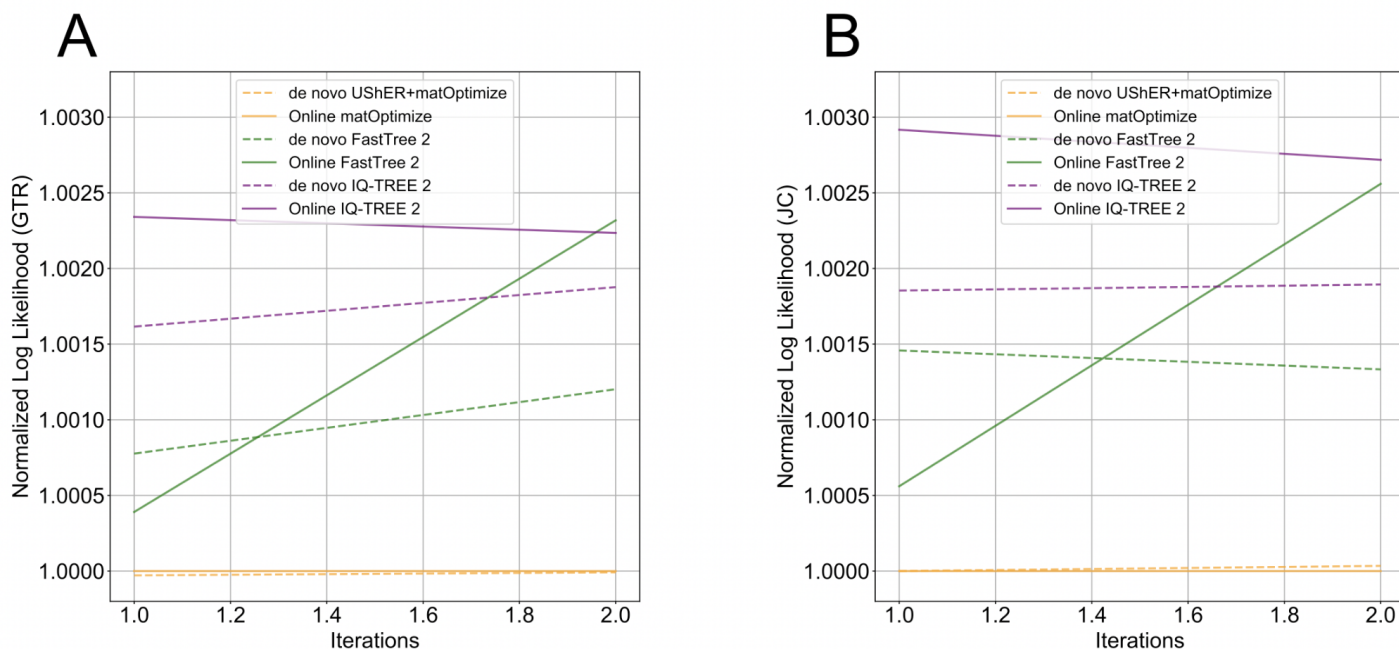

519

520 **Figure S1: Log-likelihoods calculated using Generalised Time Reversible (GTR) and Jukes-Cantor**

521 **(JC) models are correlated.** We calculated log-likelihoods for each de novo and online method as in

522 Figure 2B using (A) GTR+G and (B) JC models, which suggest that relative performance of each method

523 is consistent across models, and significantly correlated with each other. All values are normalized by the

524 value obtained for the matOptimize online approach, such that other methods are expressed as a ratio.

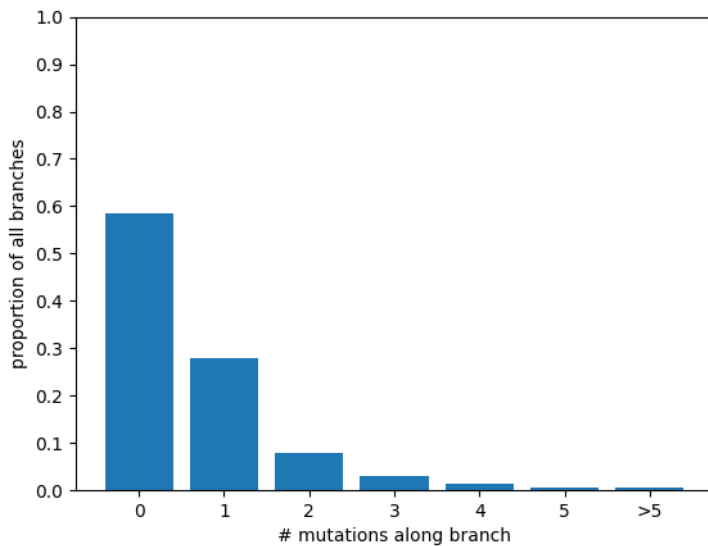

525

526 **Figure S2: Most branches in the ground truth phylogeny are extremely short. In our optimized**  
527 **global SARS-CoV-2 phylogeny, the majority of branch lengths are zero. This low amount of divergence**  
528 **yields many identical nodes in the tree and demonstrates that the probability of observing multiple**  
529 **mutations at a single site along the same branch is negligible. These characteristics may help explain the**  
530 **ability of parsimony-based inference methods to outperform likelihood optimization on SARS-CoV-2 data.**

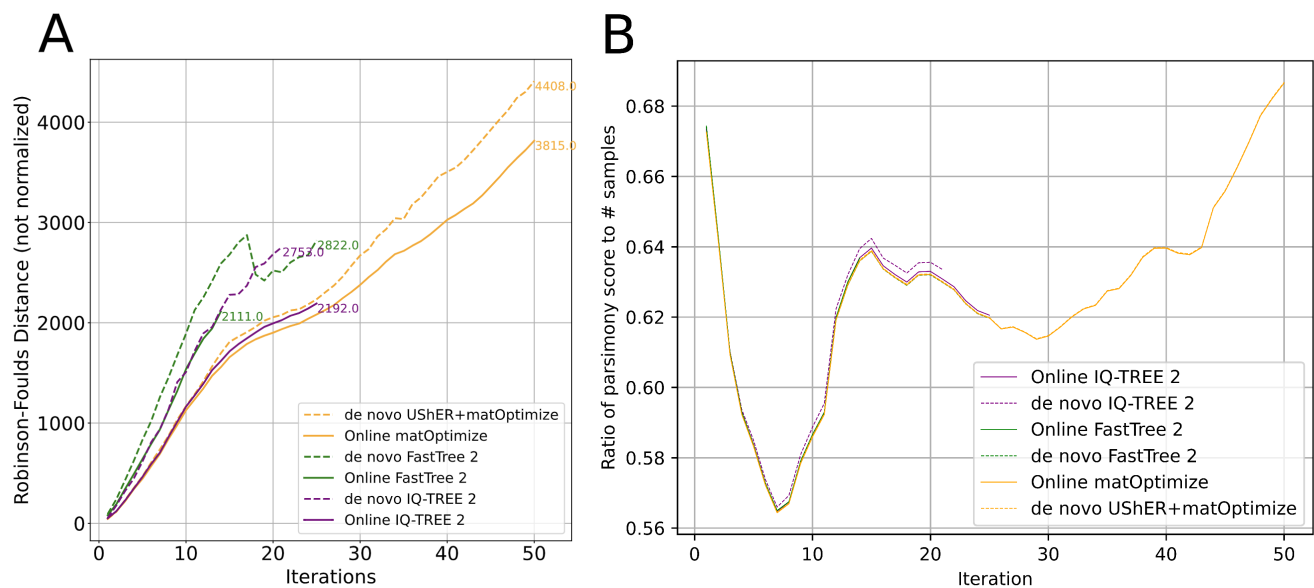

531

532 **Figure S3: Temporal patterns in simulated SARS-CoV-2 data may affect Robinson-Foulds (RF)**  
533 **distance normalization. The RF distances for each tree in Figure 2 are normalized against the**  
534 **maximum possible RF distance for that tree. While the raw RF distances are approximately continuously**



535 *increasing (A), they do not increase linearly with the maximum RF distance, leading to the pattern*  
536 *observed in Figure 2. A potential explanation for this is the variation in sequence diversity over simulated*  
537 *time. The ratio of the number of total mutations in the tree (parsimony score) to the number of samples in*  
538 *the inferred trees at each iteration (B) approximates the average divergence between samples in each*  
539 *tree. The initial drop in divergence per sample may contribute to the more rapid increase in RF distance*  
540 *because there is less phylogenetic signal to facilitate the resolution of correct topologies. As the*  
541 *divergence subsequently increases, tree inference improves before the RF distances stabilize and begin*  
542 *to increase approximately linearly.*

543

544 **Acknowledgments:** We gratefully acknowledge the authors from the originating laboratories responsible  
545 for obtaining each sample, as well as the submitting laboratories where the genome data were generated  
546 and shared, on which this research is based.

547 **Funding:** This work was supported by National Institutes of Health (R35GM128932 to R.C.D.,  
548 T32HG008345 (B.T. and J.M.), F31HG010584 to B.T.), Alfred P. Sloan Foundation fellowship, University  
549 of California Office of the President Emergency COVID-19 Research Seed Funding (R00RG2456 to  
550 R.C.-D.), European Molecular Biology Laboratory (to N.D.M.), Australian Research Council  
551 (DP200103151 to R.L.), Chan-Zuckerberg Initiative grant (to R.L.), and by Eric and Wendy Schmidt by  
552 recommendation of the Schmidt Futures program.

553 **Competing interests:** R.L. worked as an advisor to GISAID from mid 2020 to late 2021. The remaining  
554 authors declare no competing interests.

555

556

557

558 **References:**

- 559 Annavajhala M.K., Mohri H., Wang P., Nair M., Zucker J.E., Sheng Z., Gomez-Simmonds A., Kelley A.L.,  
560 Tagliavia M., Huang Y., Bedford T., Ho D.D., Uhlemann A.-C. 2021. A Novel and Expanding SARS-  
561 CoV-2 Variant, B.1.526, Identified in New York. medRxiv.
- 562 Barbera P., Kozlov A.M., Czech L., Morel B., Darriba D., Flouri T., Stamatakis A. 2019. EPA-ng:  
563 Massively Parallel Evolutionary Placement of Genetic Sequences. *Syst. Biol.* 68:365–369.
- 564 Berger S.A., Krompass D., Stamatakis A. 2011. Performance, accuracy, and Web server for evolutionary  
565 placement of short sequence reads under maximum likelihood. *Syst. Biol.* 60:291–302.
- 566 Bluhm A., Christandl M., Gesmundo F., Klausen F.R., Mančinska L., Steffan V., França D.S., Werner  
567 A.H. 2020. SARS-CoV-2 transmission routes from genetic data: A Danish case study. *PLOS ONE.*  
568 15:e0241405.
- 569 Castillo A.E., Parra B., Tapia P., Acevedo A., Lagos J., Andrade W., Arata L., Leal G., Barra G., Tambley  
570 C., Tognarelli J., Bustos P., Ulloa S., Fasce R., Fernández J. 2020. Phylogenetic analysis of the first  
571 four SARS-CoV-2 cases in Chile. *J. Med. Virol.* 92:1562–1566.
- 572 COVID-19 Genomics UK (COG-UK) Consortium. 2020. An integrated national scale SARS-CoV-2  
573 genomic surveillance network. *Lancet Microbe.* 1:e99–e100.
- 574 De Maio N., Kalaghatgi P., Turakhia Y., Corbett-Detig R., Minh B.Q., Goldman N. 2022. Maximum  
575 likelihood pandemic-scale phylogenetics. *bioRxiv*.:2022.03.22.485312.
- 576 De Maio N., Walker C.R., Turakhia Y., Lanfear R., Corbett-Detig R., Goldman N. 2021a. Mutation Rates  
577 and Selection on Synonymous Mutations in SARS-CoV-2. *Genome Biol. Evol.* 13.
- 578 De Maio N., Weilguny L., Walker C.R., Turakhia Y., Corbett-Detig R., Goldman N. 2021b. phastSim:  
579 efficient simulation of sequence evolution for pandemic-scale datasets. *bioRxiv*.
- 580 Deng X., Gu W., Federman S., du Plessis L., Pybus O.G., Faria N.R., Wang C., Yu G., Bushnell B., Pan  
581 C.-Y., Guevara H., Sotomayor-Gonzalez A., Zorn K., Gopez A., Servellita V., Hsu E., Miller S.,  
582 Bedford T., Greninger A.L., Roychoudhury P., Starita L.M., Famulare M., Chu H.Y., Shendure J.,

- 583 Jerome K.R., Anderson C., Gangavarapu K., Zeller M., Spencer E., Andersen K.G., MacCannell D.,  
584 Paden C.R., Li Y., Zhang J., Tong S., Armstrong G., Morrow S., Willis M., Matyas B.T., Mase S.,  
585 Kasiye O., Park M., Masinde G., Chan C., Yu A.T., Chai S.J., Villarino E., Bonin B., Wadford D.A.,  
586 Chiu C.Y. 2020. Genomic surveillance reveals multiple introductions of SARS-CoV-2 into Northern  
587 California. *Science*. 369:582–587.
- 588 Felsenstein J. 1978. Cases in which Parsimony or Compatibility Methods will be Positively Misleading.  
589 *Syst. Biol.* 27:401–410.
- 590 Fourment M., Claywell B.C., Dinh V., McCoy C., Matsen F.A. Iv, Darling A.E. 2018. Effective Online  
591 Bayesian Phylogenetics via Sequential Monte Carlo with Guided Proposals. *Syst. Biol.* 67:490–502.
- 592 Franceschi V.B., Caldana G.D., de Menezes Mayer A., Cybis G.B., Neves C.A.M., Ferrareze P.A.G.,  
593 Demoliner M., de Almeida P.R., Gularte J.S., Hansen A.W., Weber M.N., Fleck J.D., Zimmerman R.A.,  
594 Kmetzsch L., Spilki F.R., Thompson C.E. 2021. Genomic epidemiology of SARS-CoV-2 in Esteio,  
595 Rio Grande do Sul, Brazil. *BMC Genomics*. 22:371.
- 596 Gill M.S., Lemey P., Suchard M.A., Rambaut A., Baele G. 2020. Online Bayesian Phylodynamic  
597 Inference in BEAST with Application to Epidemic Reconstruction. *Mol. Biol. Evol.* 37:1832–1842.
- 598 Gonzalez-Reiche A.S., Hernandez M.M., Sullivan M.J., Ciferri B., Alshammary H., Obla A., Fabre S.,  
599 Kleiner G., Polanco J., Khan Z., Albuquerque B., van de Guchte A., Dutta J., Francoeur N., Melo  
600 B.S., Oussenko I., Deikus G., Soto J., Sridhar S.H., Wang Y.-C., Twyman K., Kasarskis A., Altman  
601 D.R., Smith M., Sebra R., Aberg J., Krammer F., García-Sastre A., Luksza M., Patel G., Paniz-  
602 Mondolfi A., Gitman M., Sordillo E.M., Simon V., van Bakel H. 2020. Introductions and early spread  
603 of SARS-CoV-2 in the New York City area. *Science*. 369:297–301.
- 604 Hadfield J., Megill C., Bell S.M., Huddleston J., Potter B., Callender C., Sagulenko P., Bedford T., Neher  
605 R.A. 2018. Nextstrain: real-time tracking of pathogen evolution. *Bioinformatics*. 34:4121–4123.
- 606 Hendy M.D., Penny D. 1989. A Framework for the Quantitative Study of Evolutionary Trees. *Syst. Biol.*

307

38:297–309.

- 308 Hug L.A., Baker B.J., Anantharaman K., Brown C.T., Probst A.J., Castelle C.J., Butterfield C.N.,  
309 Hernsdorf A.W., Amano Y., Ise K., Suzuki Y., Dudek N., Relman D.A., Finstad K.M., Amundson R.,  
310 Thomas B.C., Banfield J.F. 2016. A new view of the tree of life. *Nat Microbiol.* 1:16048.
- 311 Izquierdo-Carrasco F., Cazes J., Smith S.A., Stamatakis A. 2014. PUmPER: phylogenies updated  
312 perpetually. *Bioinformatics.* 30:1476–1477.
- 313 Jackson B., Boni M.F., Bull M.J., Colleran A., Colquhoun R.M., Darby A.C., Haldenby S., Hill V., Lucaci  
314 A., McCrone J.T., Nicholls S.M., O’Toole Á., Pacchiarini N., Poplawski R., Scher E., Todd F.,  
315 Webster H.J., Whitehead M., Wierzbicki C., COVID-19 Genomics UK (COG-UK) Consortium, Loman  
316 N.J., Connor T.R., Robertson D.L., Pybus O.G., Rambaut A. 2021. Generation and transmission of  
317 interlineage recombinants in the SARS-CoV-2 pandemic. *Cell.* 184:5179–5188.e8.
- 318 Kalantar K.L., Carvalho T., de Bourcy C.F.A., Dimitrov B., Dingle G., Egger R., Han J., Holmes O.B.,  
319 Juan Y.-F., King R., Kislyuk A., Lin M.F., Mariano M., Morse T., Reynoso L.V., Cruz D.R., Sheu J.,  
320 Tang J., Wang J., Zhang M.A., Zhong E., Ahyong V., Lay S., Chea S., Bohl J.A., Manning J.E., Tato  
321 C.M., DeRisi J.L. 2020. IDseq—An open source cloud-based pipeline and analysis service for  
322 metagenomic pathogen detection and monitoring. *Gigascience.* 9.
- 323 Khan A., Zia T., Suleman M., Khan T., Ali S.S., Abbasi A.A., Mohammad A., Wei D.-Q. 2021. Higher  
324 infectivity of the SARS-CoV-2 new variants is associated with K417N/T, E484K, and N501Y  
325 mutants: An insight from structural data. *J. Cell. Physiol.* 236:7045–7057.
- 326 Kolaczkowski B., Thornton J.W. 2004. Performance of maximum parsimony and likelihood phylogenetics  
327 when evolution is heterogeneous. *Nature.* 431:980–984.
- 328 Kozlov A.M., Darriba D., Flouri T., Morel B., Stamatakis A. 2019. RAXML-NG: a fast, scalable and user-  
329 friendly tool for maximum likelihood phylogenetic inference. *Bioinformatics.* 35:4453–4455.
- 330 Lam T.T.-Y. 2020. Tracking the Genomic Footprints of SARS-CoV-2 Transmission. *Trends Genet.*

331

36:544–546.

332 Lanfear R., Mansfield R. 2020. *roblanf/sarscov2phylo*: 13-11-20. .

333 Li X., Giorgi E.E., Marichannegowda M.H., Foley B., Xiao C., Kong X.-P., Chen Y., Gnanakaran S.,

334 Korber B., Gao F. 2020. Emergence of SARS-CoV-2 through recombination and strong purifying

335 selection. *Sci Adv.* 6.

336 Lu J., du Plessis L., Liu Z., Hill V., Kang M., Lin H., Sun J., François S., Kraemer M.U.G., Faria N.R.,

337 McCrone J.T., Peng J., Xiong Q., Yuan R., Zeng L., Zhou P., Liang C., Yi L., Liu J., Xiao J., Hu J.,

338 Liu T., Ma W., Li W., Su J., Zheng H., Peng B., Fang S., Su W., Li K., Sun R., Bai R., Tang X., Liang

339 M., Quick J., Song T., Rambaut A., Loman N., Raghwani J., Pybus O.G., Ke C. 2020a. Genomic

340 Epidemiology of SARS-CoV-2 in Guangdong Province, China. *Cell.* 181:997–1003.e9.

341 Lu R., Zhao X., Li J., Niu P., Yang B., Wu H., Wang W., Song H., Huang B., Zhu N., Bi Y., Ma X., Zhan

342 F., Wang L., Hu T., Zhou H., Hu Z., Zhou W., Zhao L., Chen J., Meng Y., Wang J., Lin Y., Yuan J.,

343 Xie Z., Ma J., Liu W.J., Wang D., Xu W., Holmes E.C., Gao G.F., Wu G., Chen W., Shi W., Tan W.

344 2020b. Genomic characterisation and epidemiology of 2019 novel coronavirus: implications for virus

345 origins and receptor binding. *Lancet.* 395:565–574.

346 Matsen F.A., Kodner R.B., Armbrust E.V. 2010. *pplacer*: linear time maximum-likelihood and Bayesian

347 phylogenetic placement of sequences onto a fixed reference tree. *BMC Bioinformatics.* 11:538.

348 McBroom J., Thornlow B., Hinrichs A.S., Kramer A., De Maio N., Goldman N., Haussler D., Corbett-

349 Detig R., Turakhia Y. 2021. A Daily-Updated Database and Tools for Comprehensive SARS-CoV-2

350 Mutation-Annotated Trees. *Mol. Biol. Evol.* 38:5819–5824.

351 Meredith L.W., Hamilton W.L., Warne B., Houldcroft C.J., Hosmillo M., Jahun A.S., Curran M.D., Parmar

352 S., Caller L.G., Caddy S.L., Khokhar F.A., Yakovleva A., Hall G., Feltwell T., Forrest S., Sridhar S.,

353 Weekes M.P., Baker S., Brown N., Moore E., Popay A., Roddick I., Reacher M., Gouliouris T.,

354 Peacock S.J., Dougan G., Török M.E., Goodfellow I. 2020. Rapid implementation of SARS-CoV-2

- 355 sequencing to investigate cases of health-care associated COVID-19: a prospective genomic  
356 surveillance study. *Lancet Infect. Dis.* 20:1263–1271.
- 357 Minh B.Q., Schmidt H.A., Chernomor O., Schrempf D., Woodhams M.D., von Haeseler A., Lanfear R.  
358 2020. IQ-TREE 2: New Models and Efficient Methods for Phylogenetic Inference in the Genomic  
359 Era. *Mol. Biol. Evol.* 37:1530–1534.
- 360 Moreno G.K., Braun K.M., Riemersma K.K., Martin M.A., Halfmann P.J., Crooks C.M., Prall T., Baker D.,  
361 Baczenas J.J., Heffron A.S., Ramuta M., Khubbar M., Weiler A.M., Accola M.A., Rehrauer W.M.,  
362 O'Connor S.L., Safdar N., Pepperell C.S., Dasu T., Bhattacharyya S., Kawaoka Y., Koelle K.,  
363 O'Connor D.H., Friedrich T.C. 2020. Revealing fine-scale spatiotemporal differences in SARS-CoV-2  
364 introduction and spread. *Nat. Commun.* 11:5558.
- 365 Paradis E., Schliep K. 2019. ape 5.0: an environment for modern phylogenetics and evolutionary  
366 analyses in R. *Bioinformatics*.
- 367 Park A.K., Kim I.-H., Kim J., Kim J.-M., Kim H.M., Lee C.Y., Han M.-G., Rhie G.-E., Kwon D., Nam J.-G.,  
368 Park Y.-J., Gwack J., Lee N.-J., Woo S., No J.S., Lee J., Ha J., Rhee J., Yoo C.-K., Kim E.-J. 2021.  
369 Genomic Surveillance of SARS-CoV-2: Distribution of Clades in the Republic of Korea in 2020.  
370 *Osong Public Health Res Perspect.* 12:37–43.
- 371 Parks D.H., Chuvochina M., Waite D.W., Rinke C., Skarshewski A., Chaumeil P.-A., Hugenholtz P. 2018.  
372 A standardized bacterial taxonomy based on genome phylogeny substantially revises the tree of life.  
373 *Nat. Biotechnol.* 36:996–1004.
- 374 Peng J., Liu J., Mann S.A., Mitchell A.M., Laurie M.T., Sunshine S., Pilarowski G., Ayscue P., Kistler A.,  
375 Vanaerschot M., Li L.M., McGeever A., Chow E.D., Marquez C., Nakamura R., Rubio L., Chamie G.,  
376 Jones D., Jacobo J., Rojas S., Rojas S., Tulier-Laiwa V., Black D., Martinez J., Naso J., Schwab J.,  
377 Petersen M., Havlir D., DeRisi J., IDseq Team. 2021. Estimation of secondary household attack  
378 rates for emergent spike L452R SARS-CoV-2 variants detected by genomic surveillance at a  
379 community-based testing site in San Francisco. *Clin. Infect. Dis.*

- 380 Philippe H., Zhou Y., Brinkmann H., Rodrigue N., Delsuc F. 2005. Heterotachy and long-branch  
381 attraction in phylogenetics. *BMC Evol. Biol.* 5:50.
- 382 Price M.N., Dehal P.S., Arkin A.P. 2010. FastTree 2--approximately maximum-likelihood trees for large  
383 alignments. *PLoS One.* 5:e9490.
- 384 Rambaut A., Holmes E.C., O'Toole Á., Hill V., McCrone J.T., Ruis C., du Plessis L., Pybus O.G. 2020. A  
385 dynamic nomenclature proposal for SARS-CoV-2 lineages to assist genomic epidemiology. *Nature*  
386 *Microbiology.* 5:1403–1407.
- 387 Robinson D.F., Foulds L.R. 1981. Comparison of phylogenetic trees. *Math. Biosci.* 53:131–147.
- 388 Sanderson T. 2021a. taxonium: Explore very large trees in the browser. Github.  
389 <https://github.com/theosanderson/taxonium>
- 390 Sanderson T. 2021b. Chronumental: time tree estimation from very large phylogenies.  
391 *bioRxiv.*:2021.10.27.465994.
- 392 Sayers E.W., Cavanaugh M., Clark K., Pruitt K.D., Schoch C.L., Sherry S.T., Karsch-Mizrachi I. 2021.  
393 GenBank. *Nucleic Acids Res.* 49:D92–D96.
- 394 Shu Y., McCauley J. 2017. GISAID: Global initiative on sharing all influenza data – from vision to reality.  
395 *Eurosurveillance.* 22.
- 396 Skidmore P.T., Kaelin E.A., Holland L.R.A., Maqsood R. 2021. Emergence of a SARS-CoV-2 E484K  
397 variant of interest in Arizona. *medRxiv.*
- 398 Stamatakis A. 2014. RAxML version 8: a tool for phylogenetic analysis and post-analysis of large  
399 phylogenies. *Bioinformatics.* 30:1312–1313.
- 700 Steel M.A., Penny D. 1993. Distributions of tree comparison metrics—some new results. *Syst. Biol.*
- 701 Sullivan J., Swofford D.L. 2001. Should We Use Model-Based Methods for Phylogenetic Inference When  
702 We Know That Assumptions About Among-Site Rate Variation and Nucleotide Substitution Pattern

703

Are Violated? *Systematic Biology*. 50:723–729.

704

Tang J.W., Toovey O.T.R., Harvey K.N., Hui D.D.S. 2021. Introduction of the South African SARS-CoV-2 variant 501Y.V2 into the UK. *J. Infect.* 82:e8–e10.

705

706

Tegally H., Wilkinson E., Giovanetti M., Iranzadeh A., Fonseca V., Giandhari J., Doolabh D., Pillay S.,

707

San E.J., Msomi N., Mlisana K., von Gottberg A., Walaza S., Allam M., Ismail A., Mohale T., Glass

708

A.J., Engelbrecht S., Van Zyl G., Preiser W., Petruccione F., Sigal A., Hardie D., Marais G., Hsiao

709

N.-Y., Korsman S., Davies M.-A., Tyers L., Mudau I., York D., Maslo C., Goedhals D., Abrahams S.,

710

Laguda-Akingba O., Alisoltani-Dehkordi A., Godzik A., Wibmer C.K., Sewell B.T., Lourenço J.,

711

Alcantara L.C.J., Kosakovsky Pond S.L., Weaver S., Martin D., Lessells R.J., Bhiman J.N.,

712

Williamson C., de Oliveira T. 2021. Detection of a SARS-CoV-2 variant of concern in South Africa.

713

*Nature*. 592:438–443.

714

Thornlow B., Hinrichs A.S., Jain M., Dhillon N., La S., Kapp J.D., Anigbogu I., Cassatt-Johnstone M.,

715

McBroome J., Haeussler M., Turakhia Y., Chang T., Olsen H.E., Sanford J., Stone M., Vaske O.,

716

Bjork I., Akeson M., Shapiro B., Haussler D., Kilpatrick A.M., Corbett-Detig R. 2021a. A new SARS-

717

CoV-2 lineage that shares mutations with known Variants of Concern is rejected by automated

718

sequence repository quality control. *bioRxiv*.

719

Thornlow B., roblanf, Corbett-Detig R., Turakhia Y., Cheng Y. 2021b. *bpt26/parsimony*: .

720

Tian F., Tong B., Sun L., Shi S., Zheng B., Wang Z., Dong X., Zheng P. 2021. Mutation N501Y in RBD of Spike Protein Strengthens the Interaction between COVID-19 and its Receptor ACE2.

721

*bioRxiv*:2021.02.14.431117.

722

723

Turakhia Y., Thornlow B., Hinrichs A.S., De Maio N., Gozashti L., Lanfear R., Haussler D., Corbett-Detig

724

R. 2021a. Ultrafast Sample placement on Existing tRees (USHER) enables real-time phylogenetics

725

for the SARS-CoV-2 pandemic. *Nat. Genet.* 53:809–816.

726

Turakhia Y., Thornlow B., Hinrichs A.S., Mcbroome J. 2021b. Pandemic-Scale phylogenomics reveals



|  
727

elevated recombination rates in the SARS-CoV-2 spike region. bioRxiv.

728

Umair M., Ikram A., Salman M., Khurshid A., Alam M., Badar N., Suleman R., Tahir F., Sharif S.,

729

Montgomery J., Whitmer S., Klena J. 2021. Whole-genome sequencing of SARS-CoV-2 reveals the

730

detection of G614 variant in Pakistan. PLoS One. 16:e0248371.

731

Wang W., Barbetti J., Wong T., Thornlow B., Corbett-Detig R., Turakhia Y., Lanfear R., Minh B.Q. 2022.

732

DecentTree: Scalable Neighbour-Joining for the Genomic Era. bioRxiv.:2022.04.10.487712.

733

Wertheim J.O., Steel M., Sanderson M.J. 2021. Accuracy in near-perfect virus phylogenies. Syst. Biol.

734

Ye C., Thornlow B., Hinrichs A., Torvi D., Lanfear R., Corbett-Detig R., Turakhia Y. 2022. matOptimize: A

735

parallel tree optimization method enables online phylogenetics for SARS-CoV-2.

736

bioRxiv.:2022.01.12.475688.

737

738

739

740

741
